# Supplementary material
Source: publisher figshare collection journal article supplement (https://acs.figshare.com/ndownloader/files/7615228)
Supplement: Supplementary file 1 [file 7615228]

## **Supporting Information**

### **Enhanced Spatially Resolved Proteomics Using On-tissue Hydrogel-mediated Protein Digestion**

David G. Rizzo,<sup>1,3</sup> Boone M. Prentice,<sup>2,3</sup> Jessica L. Moore,<sup>1,3</sup> Jeremy L. Norris,<sup>1,2,3</sup> Richard M.  
Caprioli<sup>1,2,3,4</sup>

<sup>1</sup>Department of Chemistry, <sup>2</sup>Department of Biochemistry, <sup>3</sup>Mass Spectrometry Research Center,

<sup>4</sup>Departments of Pharmacology and Medicine, Vanderbilt University, Nashville, TN, USA

\*Address correspondence to:

Dr. R. M. Caprioli

9160 MRB III

Department of Biochemistry

Vanderbilt University

Nashville, TN 37232, USA

Phone: (615) 322-4336

Fax: (615) 343-8372

E-mail: [richard.m.caprioli@vanderbilt.edu](mailto:richard.m.caprioli@vanderbilt.edu)

| <i>% Acrylamide</i>     | <b>7.5%</b> | <b>10%</b> | <b>12%</b> | <b>15%</b> | <b>18%</b> |
|-------------------------|-------------|------------|------------|------------|------------|
| 30% Acrylamide/Bis (mL) | 1.25        | 1.67       | 2.00       | 2.50       | 3.00       |
| 1.5 M Tris, pH 8.7 (mL) | 1.25        | 1.25       | 1.25       | 1.25       | 1.25       |
| ddH <sub>2</sub> O (ml) | 2.48        | 2.06       | 1.73       | 1.23       | 0.73       |

**Supplemental Figure S-1: Gel formulation protocols for each percentage polyacrylamide. These solutions were degassed prior to polymerization with 50  $\mu$ L 10% ammonium persulfate and 10  $\mu$ L TEMED.**

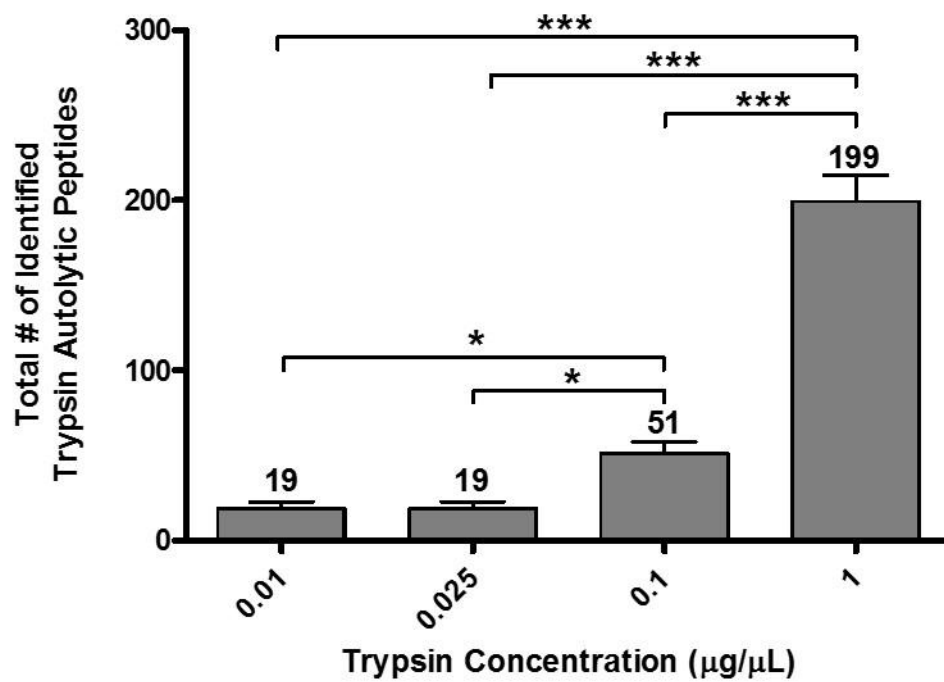

**Supplemental Figure S-2: Average numbers of identified trypsin autolytic peptides from 7.5% polyacrylamide hydrogels (~2.6 mm diameter) containing varying concentrations of trypsin. Each hydrogel was placed on a 12 µm thick section of rat liver (n=3 for each concentration, \*:  $p \leq 0.05$ , \*\*\*  $p \leq 0.001$ ).**

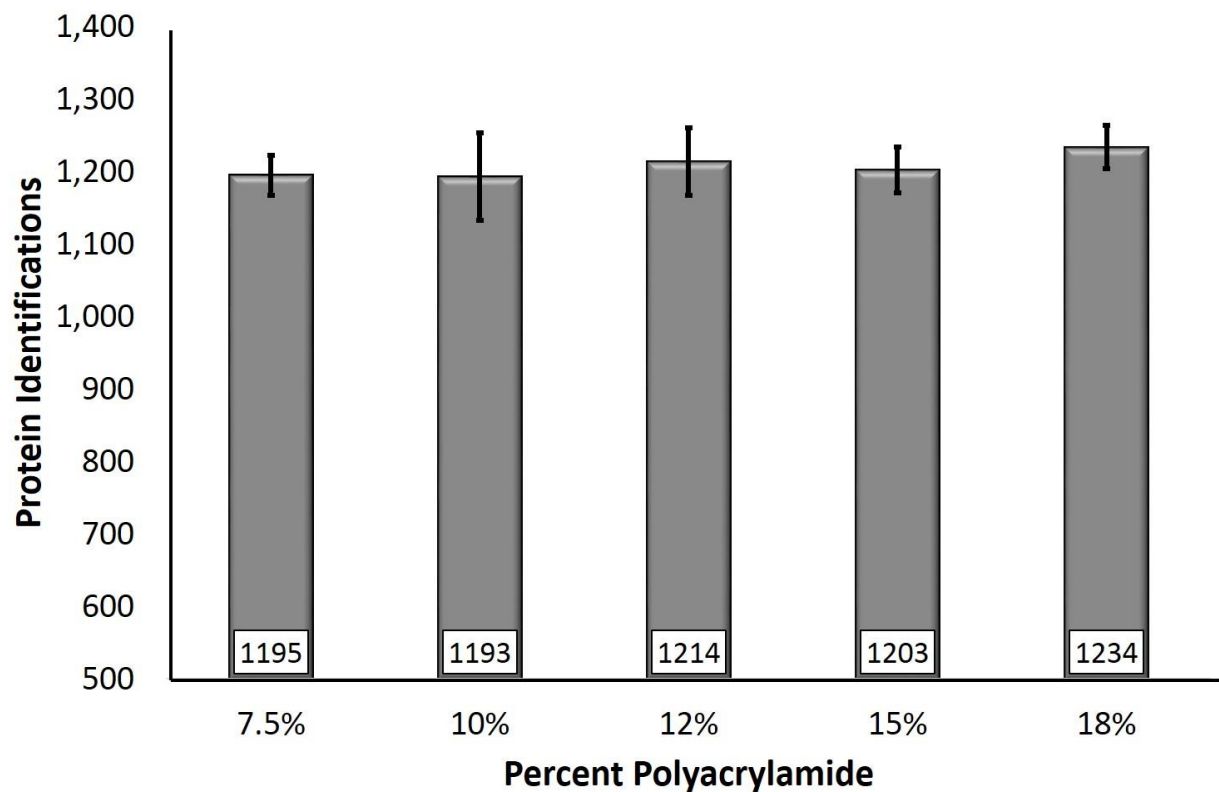

**Supplemental Figure S-3: Protein identifications are unchanged for ~2.6 mm diameter hydrogels fabricated using different percentages of polyacrylamide. Each hydrogel was placed on a 12  $\mu$ m thick section of rat liver and contained 0.1  $\mu$ g/ $\mu$ L trypsin ( $n \geq 3$  for each percentage).**

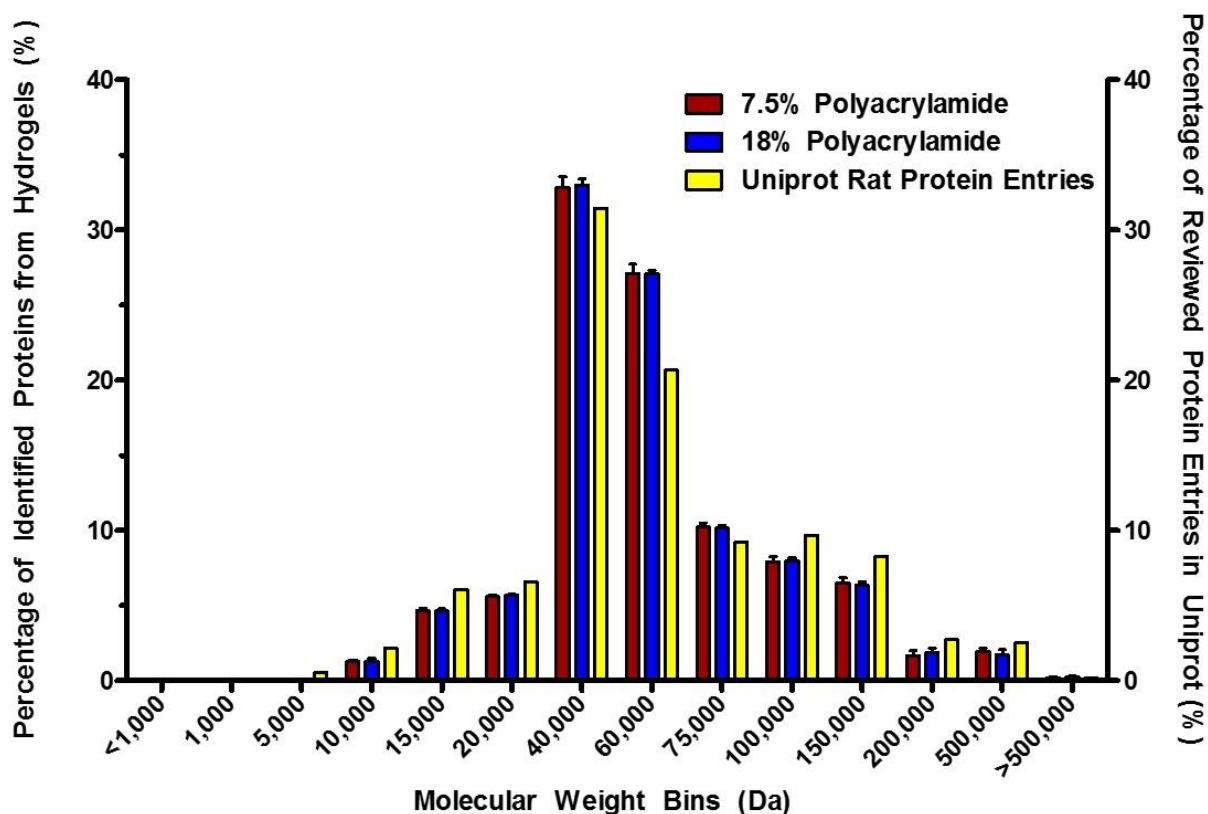

**Supplemental Figure S-4: Molecular weight distributions of protein identifications from 7.5% and 18% polyacrylamide hydrogels and the reviewed protein identifications in the Uniprot rat protein database. Masses of identified proteins were binned for the 7.5% (red) and 18% (blue) polyacrylamide hydrogels (left axis), as well as the UniProt rat proteome (yellow – right axis). n=5 for both of the hydrogel conditions.**

**Supplemental Figure S-5: Complete list of proteins identified from the experiment described in Figure 5 (see Excel file).**
